# Supplementary material for: Gene Expression Modification by an Autosomal Inversion Associated With Three Male Mating Morphs
Source: PubMed Central journal article supplement (PMC8213371; doi:10.3389/fgene.2021.641620), 2021-06-04

## Supplementary Figures

### Figure S1. Representative example of standard curve results used to assess allele-specificity in ancestral and inversion-specific primers

Screenshots for standard curve results for the *ZDHCC7* gene showing ‘ancestral’ primers that detect expression from the common ancestral allele and those that detect expression from the Faeder inversion. The ‘ancestral’ primers perform with an efficiency above 1.9 with cDNA from an Independent male, as well as with cDNA from a Faeder male. Similarly, Faeder-specific primers amplify with an efficiency above 1.9 when used with Faeder cDNA. The crossing point for these amplicons is in the range of cycles 26-30. In contrast, when cDNA from an Independent male is tested with Faeder-specific primers amplification is inconsistent between duplicate wells, which results in a non-linear plot and an extremely low efficiency (1.3), which is well below our criteria for acceptable efficiency ( $\geq 1.9$ ). This indicates that Faeder-specific primers do not amplify cDNA from the ancestral allele, even when cDNA from the Faeder inversion allele is absent. These results paired with melt curve checks were used to deem inversion-specific primers as acceptable or not, therefore only four genes (out of 11 initially tested) passed all criteria.

#### *ZDHCC7*

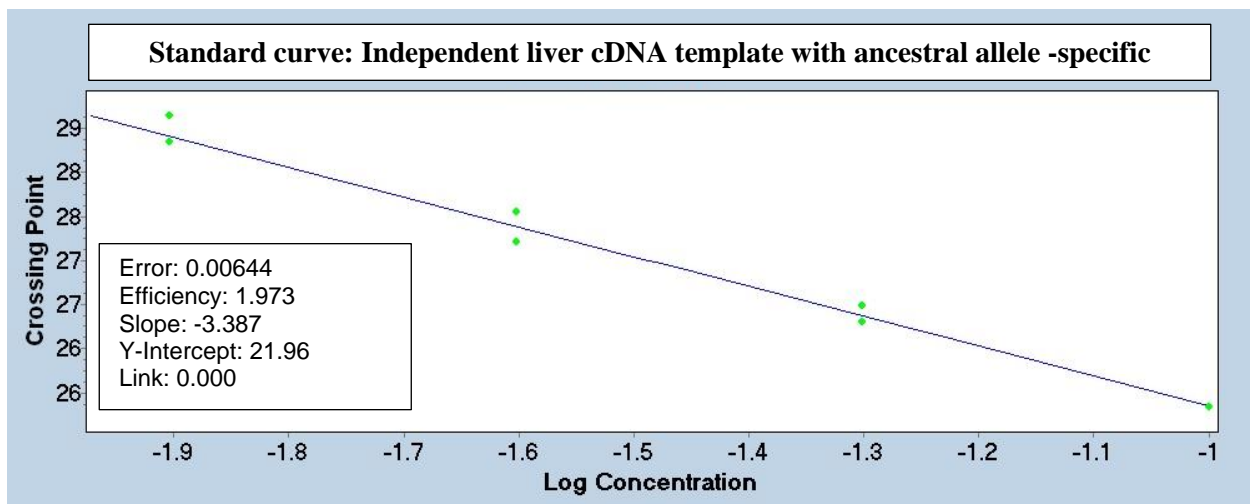

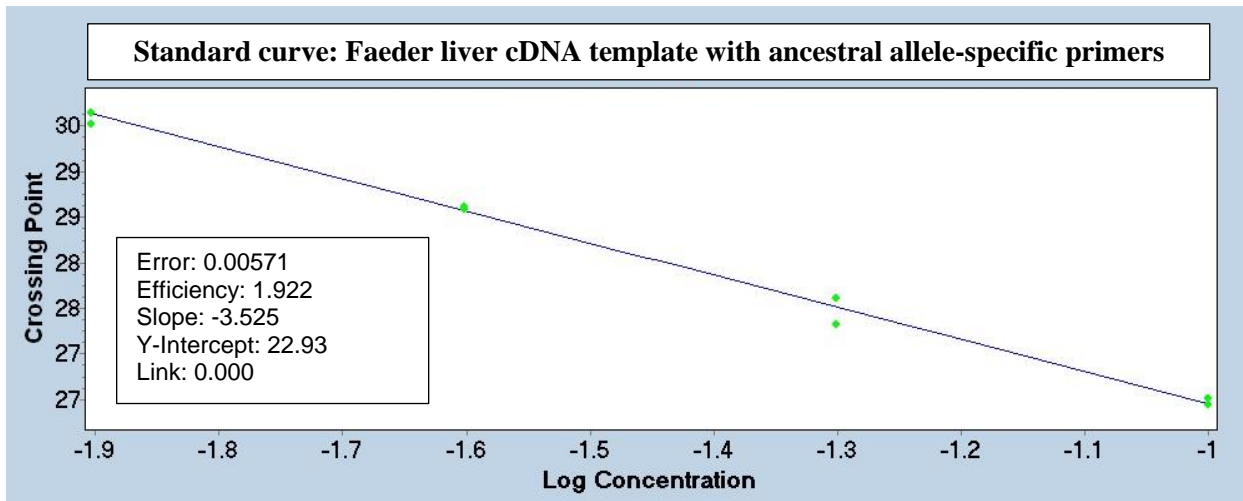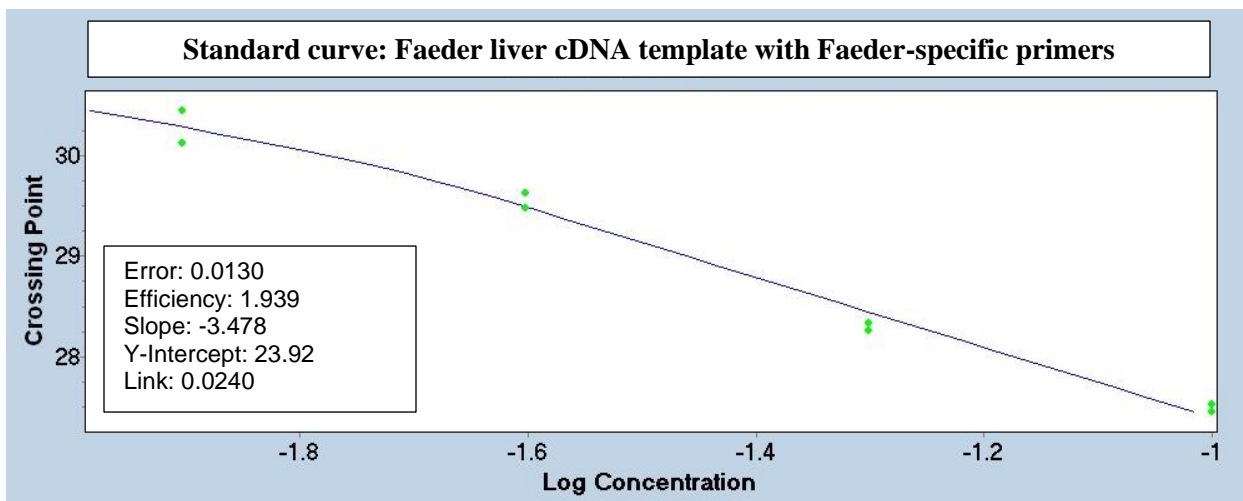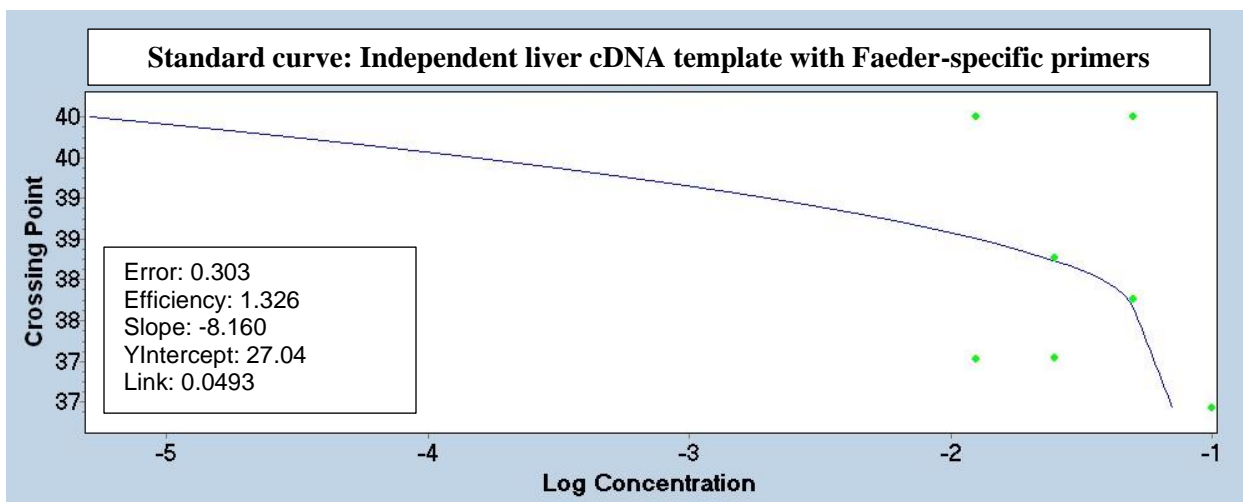

## Figure S2. Gonadosomatic indices and gonad mass

Morphs do not differ in absolute gonad mass, but when gonad mass is corrected by body mass to create a gonadosomatic index [ $GSI = (\text{gonad mass} \times 100) / \text{body mass}$ ], Faeders have larger relative testes size compared to Satellites and Independents. Asterisks indicate statistically clear differences between morphs, \*  $p < 0.05$ , \*\*\*  $p < 0.001$

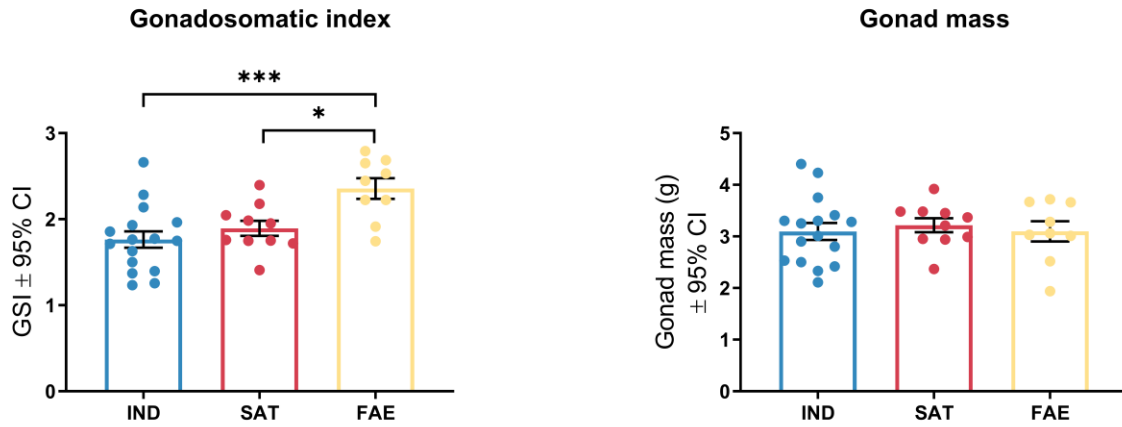

**Figure S3. LDA analysis with sequential removal of genes with heaviest loadings**

Panels A-D are shown in the main manuscript in Fig. 5. Panels E-I depict subsequent linear discriminant analyses that we performed by removing the heaviest positive and negative LD1 loadings following the table below. The dataset size refers to the number of genes. The separation of Faeders from the other two morphs largely persisted even after both inversion genes (*HSD17B2* and *SDR42E1*) were removed, as evidence even in panel H. All three morphs clustered together only in the three-gene dataset (I).

| Panel | Dataset size | Genes removed                  |
|-------|--------------|--------------------------------|
| A     | 14           | None                           |
| B     | 13           | <i>ESR2</i>                    |
| C     | 13           | <i>HSD17B2</i>                 |
| D     | 12           | <i>ESR2</i> , <i>HSD17B2</i>   |
| E     | 10           | <i>LHR</i> , <i>PGR</i>        |
| F     | 8            | <i>ESR1</i> , <i>SRD5A1</i>    |
| G     | 6            | <i>SDR42E1</i> , <i>SRD5A2</i> |
| H     | 4            | <i>FSHR</i> , <i>AR</i>        |
| I     | 3            | <i>STAR</i>                    |

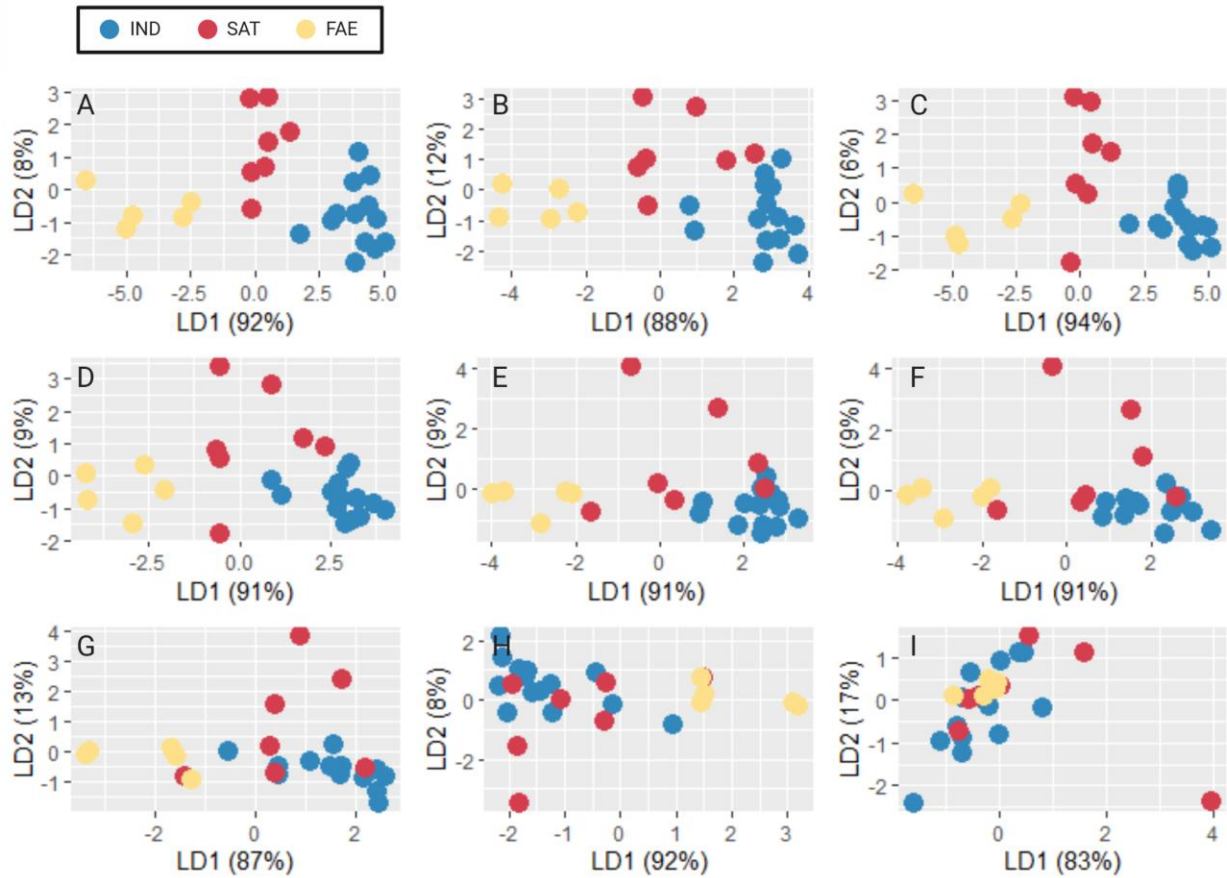

### Figure S4. LDA analysis with sequential removal of genes with lightest loadings

Panel A depicts the LDA analysis with the full 14 gene dataset (same as Fig. 5A). Panels B-G depict subsequent linear discriminant analyses that we performed by removing the lightest positive and negative LD1 loadings following the table below. The dataset size refers to the number of genes. The separation of Faeders from the other two morphs largely persisted up until the 8 gene dataset (D). In the following panels, still some separation of Independents from inversion morphs is visible, but all three morphs also overlap (E, F). Morphs finally cluster in (G).

| Panel | Dataset size | Genes removed         |
|-------|--------------|-----------------------|
| A     | 14           | None                  |
| B     | 12           | <i>ARO, HSD17B3</i>   |
| C     | 10           | <i>SRD5A2, HSD3B2</i> |
| D     | 8            | <i>AR, SDR42E1</i>    |
| E     | 6            | <i>STAR, ESR1</i>     |
| F     | 4            | <i>LHR, HSD17B2</i>   |
| G     | 2            | <i>FSHR, SRD5A1</i>   |

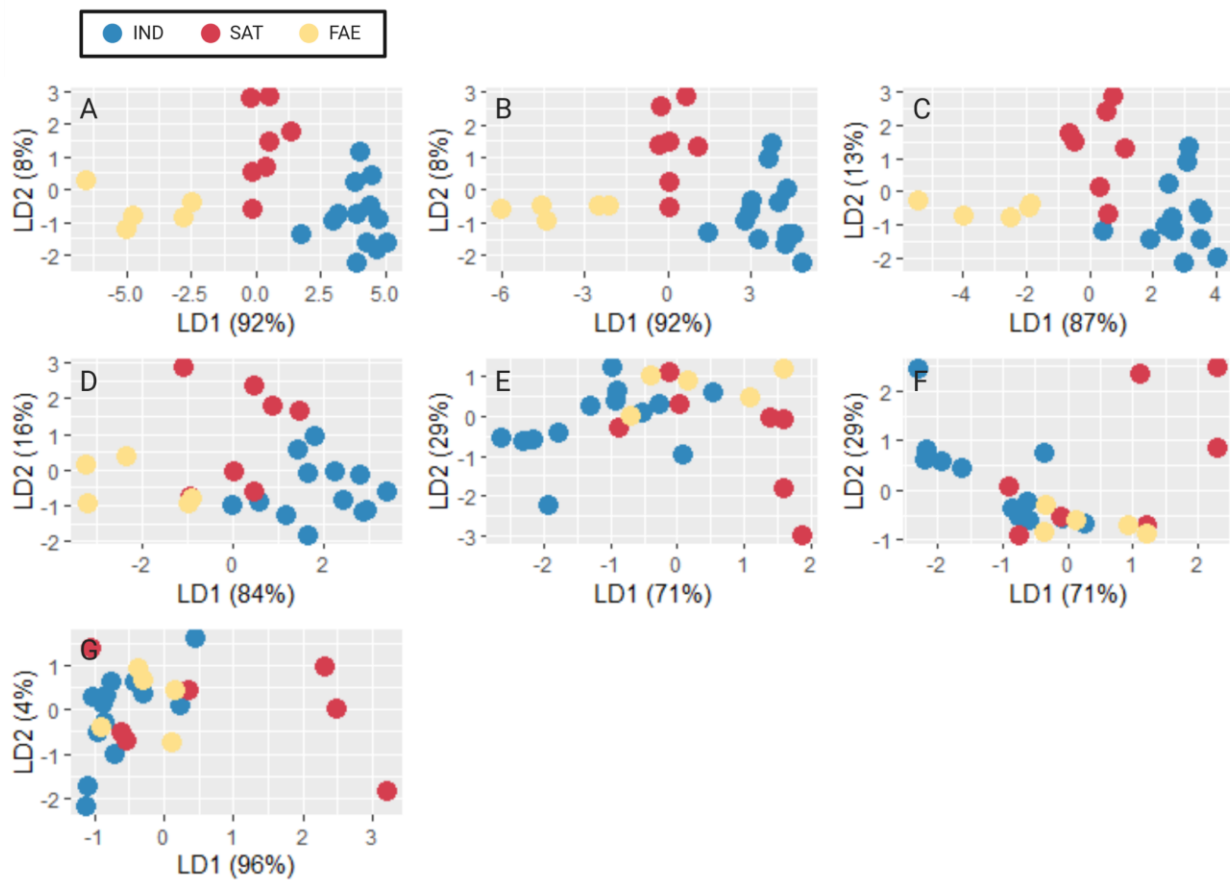

Supplement: Data_Sheet_1.pdf [file Data_Sheet_1.pdf]
